# Supplementary material for: Predictors of study dropout in cognitive-behavioural therapy with a trauma focus for post-traumatic stress disorder in adults: An individual participant data meta-analysis
Source: PubMed Central journal article supplement — BMJ Ment Health. 2024 Nov 13;27(1):e301159. doi: 10.1136/bmjment-2024-301159 (PMC11580285; doi:10.1136/bmjment-2024-301159), 2024-11-13
Supplement: bmjment-27-1-s001.pdf [file bmjment-27-1-s001.pdf]

## Appendix 1

Example of the academic database search (PubMed)

```
((((((((((((((("Stress Disorders, Post-Traumatic"[Mesh]) OR ((PTSD OR "acute stress disorder*" OR "combat disorder*" OR "war neuros*")))) OR (((acute OR traumatic) AND stress*) AND (expos* OR psyc*))) OR (((posttrauma* or post-trauma* or "post trauma*") AND (stress* or disorder* or psych* or symptom?))) OR (("traumatised victim" OR "traumatized victim" OR "traumatised victim" OR "traumatised survivor" OR "traumatized survivor")) OR ((trauma* AND (event or memor* or flashback* or nightmare))) OR (((trauma* or posttrauma* or post-trauma* or victim* or survivor?) AND (exposure AND (therap* or psychotherap* or training or counsel*)))))) OR crisis intervention[MeSH Terms]) OR (((("critical incident" AND (stress or debrief* or de-brief*))) OR ((debrief*[Title] OR de-brief*[Title])))) OR (("crisis intervention" or CISD)) OR (((stress or group* or psychological or crisis) AND (debrief* or de-brief*))) OR (((trauma* AND (event or memor* or flashback* or nightmare))) OR ((EMDR or "eye movement desensitisation and reprocessing" or "eye movement desensitization and reprocessing")))) AND (((("randomized controlled trial"[Publication Type]) OR "controlled clinical trial"[Publication Type]) OR ((randomized[Title/Abstract] OR randomised[Title/Abstract])) OR placebo[Title/Abstract]) OR ((Randomly or random))) OR trial[Title/Abstract])
```

## Appendix 2

### Preferred Reporting Items for Systematic Review and Meta-analyses (PRISMA) Individual Patient Data (IPD) Study Selection Process

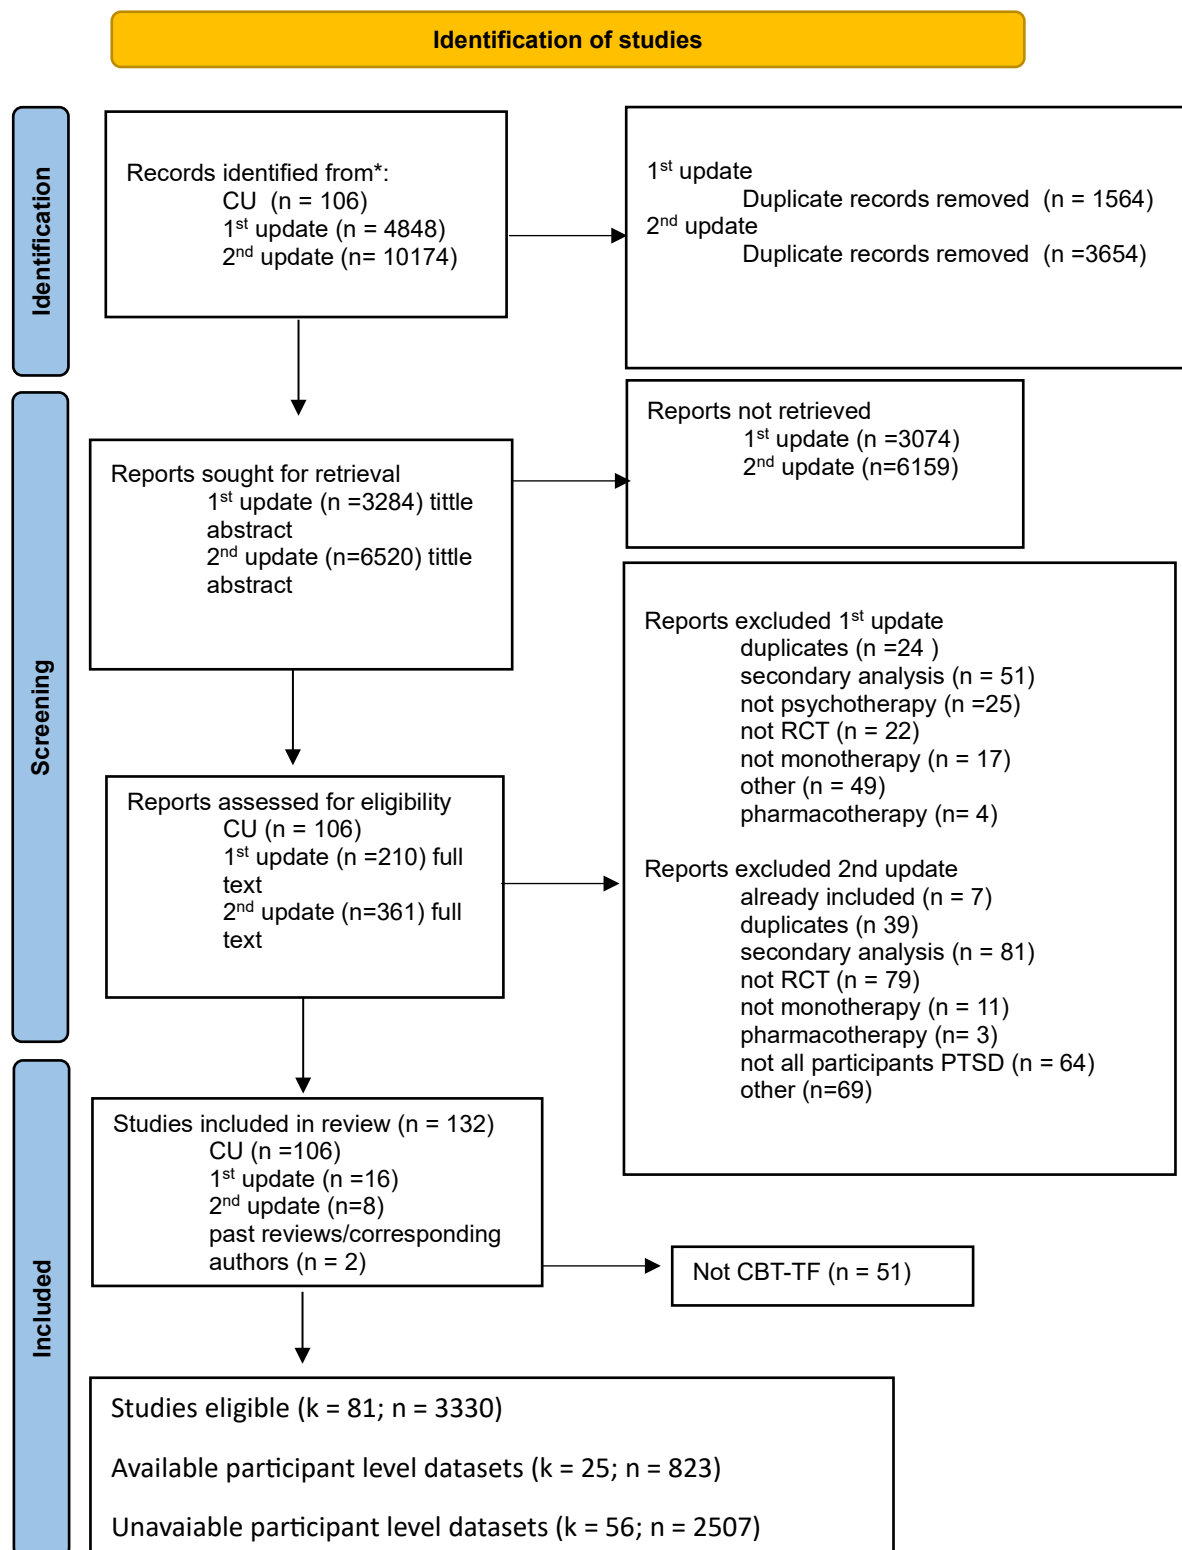

CU = Cardiff University; CBT-TF = cognitive behavioral therapy with a trauma focus; RCT = randomized controlled trial; k = number of studies

## Appendix 3

### Definitins of the CBT-TF interventions for PTSD

| Intervention                                                                                                     | Description                                                                                                                                                                                                                                                                                                                                                           |
|------------------------------------------------------------------------------------------------------------------|-----------------------------------------------------------------------------------------------------------------------------------------------------------------------------------------------------------------------------------------------------------------------------------------------------------------------------------------------------------------------|
| Brief Eclectic Psychotherapy <sup>a</sup><br><i>BEP</i>                                                          | BEP merges aspects of CBT with psychodynamic therapy, emphasizing the emotional processing of trauma. It often incorporates writing exercises, therapeutic correspondence, and discussions on existential topics, with a strong focus on the therapeutic relationship. The therapy typically concludes with a farewell ritual.                                        |
| Cognitive Behavioural Therapy with a Trauma Focus <sup>b</sup><br><i>CBT-TF</i>                                  | CBT-TF encompasses various therapies aimed at assisting those with PTSD by altering their thoughts, beliefs, and behaviors. This method typically involves educational sessions, exposure exercises, cognitive techniques, and relaxation or stress management strategies, though the emphasis on each component may differ depending on the specific form of CBT-TF. |
| Cognitive Behavioural Therapy for Trauma-Focused Coping <sup>c</sup><br><i>COPE</i>                              | COPE is tailored for treating individuals with both PTSD and substance use disorders. It integrates traditional CBT methods with trauma-focused strategies to address trauma and substance use simultaneously, helping individuals develop coping mechanisms, reduce substance use, and enhance overall functioning.                                                  |
| Cognitive Therapy for PTSD <sup>d</sup><br><i>CPT</i>                                                            | CPT focuses on evaluating and modifying problematic thoughts that arise after traumatic events, such as beliefs that the individual is to blame or that the world is unsafe. It may also involve creating a detailed written narrative of the traumatic experience.                                                                                                   |
| Narrative Exposure Therapy <sup>e</sup><br><i>NET</i>                                                            | NET is designed for individuals with multiple or complex traumas. It involves creating a detailed life narrative, focusing on traumatic experiences to help integrate these memories into the broader life story, reducing their emotional impact.                                                                                                                    |
| Prolonged Exposure Therapy <sup>f</sup><br><i>PE</i>                                                             | PE involves repeated and detailed exposure to trauma-related memories, feelings, and situations to reduce distress. The approach typically includes recounting traumatic experiences and real-life exposure to fear-evoking but safe situations to promote habituation.                                                                                               |
| Reconsolidation of Traumatic Memories <sup>g</sup><br><i>RTM</i>                                                 | RTM involves activating a traumatic memory and then using a technique where the individual imagines the event as a black-and-white movie, dissociated from its content, and re-winds it quickly to change the memory's perspective.                                                                                                                                   |
| Skills Training in Affective and Interpersonal Regulation with Narrative Therapy <sup>h</sup><br><i>STAIR-NT</i> | STAIR-NT is a therapeutic method that combines emotional regulation skills training with narrative therapy to help individuals process and reframe their traumatic experiences, particularly in cases of complex trauma.                                                                                                                                              |
| Trauma-Informed Present-Centered Safety Skills <sup>i</sup><br><i>TIPSS</i>                                      | TIPSS is a specialized CBT approach for individuals with PTSD who are not ready for trauma-focused exposure therapies. It focuses on developing safety skills, emotional regulation, and present-centered awareness, emphasizing coping strategies without delving deeply into traumatic details.                                                                     |
| Trial-based cognitive therapy <sup>j</sup><br><i>TBCBT</i>                                                       | TBCBT is a structured form of cognitive therapy designed to address and modify maladaptive beliefs and cognitive distortions that sustain PTSD. This therapy is conducted through a series of "trials," where patients critically assess their negative beliefs in a court-like setting, helping them to re-evaluate and restructure their thoughts.                  |

PTSD = posttraumatic stress disorder; <sup>a</sup> Gersons, B. P. R., Meewisse, M. L., Nijdam, M. J., & Olf, M. (2011). Protocol Brief Eclectic Psychotherapy for Posttraumatic Stress Disorder (BEPP). Center for Psychological Trauma, Department of Psychiatry, Academic Medical Center at the University of Amsterdam, and Arq Psychotrauma Expert Group; <sup>b</sup> International Society for Traumatic Stress Studies. (2019b). IISTSS PTSD Guidelines – Methodology and Recommendations [https://istss.org/wp-content/uploads/2024/08/IISTSS\\_PreventionTreatmentGuidelines\\_FNL-March-19-2019.pdf](https://istss.org/wp-content/uploads/2024/08/IISTSS_PreventionTreatmentGuidelines_FNL-March-19-2019.pdf); <sup>c</sup> Back, S. E., Killeen, T., Badour, C. L., Flanagan, J. C., Allan, N. P., Ana, E. S., Lozano, B., Korte, K. J., Foa, E. B., & Brady, K. T. (2019). Concurrent treatment of substance use disorders and PTSD using prolonged exposure: A randomized clinical trial in military veterans. *Addict Behav*, 90, 369-377. <https://doi.org/10.1016/j.addbeh.2018.11.032>; <sup>d</sup> Resick, P. A., Monson, C. M., & Chard, K. M. (2017). *Cognitive processing therapy for PTSD: A comprehensive manual*. The Guilford Press; <sup>e</sup> Schauer, M., Neuner, F., & Elbert, T. (2011). *Narrative Exposure Therapy: A Short-Term Treatment for Traumatic Stress Disorders*. Hogrefe Publishing. <https://books.google.co.za/books?id=zUxfAqAAQBAJ>; <sup>f</sup> Foa, E. B., Hembree, E. A., Rothbaum, B. O., & Rauch, S. A. M. (2019). *Prolonged exposure therapy for PTSD: Emotional processing of traumatic experiences: Therapist guide, 2nd ed* [doi:10.1093/med-psych/9780190926939.001.0001]. Oxford University Press. <https://doi.org/10.1093/med-psych/9780190926939.001.0001>; <sup>g</sup> Tylee, T., Gray, R., Glatt, S. J., & Bourke, F. (2017). Evaluation of the reconsolidation of traumatic memories protocol for the treatment of PTSD: A randomized, wait-list-controlled trial. *Journal of Military Veteran and Family Health* 3(1), 21-33. <https://doi.org/10.3138/jmvfh.4120>; <sup>h</sup> Cloitre, M., Koenen, K. C., Cohen, L. R., & Han, H. (2002). Skills training in affective and interpersonal regulation followed by exposure: a phase-based treatment for PTSD related to childhood abuse. *J Consult Clin Psychol*, 70(5), 1067-1074. <https://doi.org/10.1037//0022-006x.70.5.1067>; <sup>i</sup> Vujanovic, A. A., Smith, L. J., Green, C. E., Lane, S. D., & Schmitz, J. M. (2018). Development of a novel, integrated cognitive-behavioral therapy for co-occurring posttraumatic stress and substance use disorders: A pilot randomized clinical trial. *Contemp Clin Trials*, 65, 123-129. <https://doi.org/10.1016/j.cct.2017.12.013>; <sup>j</sup> Duran, É. P., Corchs, F., Vianna, A., Araújo, Á. C., Del Real, N., Silva, C., Ferreira, A. P., De Vito Francez, P., Godói, C., Silveira, H., Matsumoto, L., Gebara, C. M., de Barros Neto, T. P., Chilvarquer, R., de Siqueira, L. L., Bernik, M., & Neto, F. L. (2021). A randomized clinical trial to assess the efficacy of trial-based cognitive therapy compared to prolonged exposure for post-traumatic stress disorder: preliminary findings. *CNS spectrums*, 26(4), 427–434. <https://doi.org/10.1017/S1092852920001455>

## Appendix 4

### Available participant level data

1. Back, S. E., Killeen, T., Badour, C. L., Flanagan, J. C., Allan, N. P., Ana, E. S. . . Brady, K. T. (2019). Concurrent treatment of substance use disorders and PTSD using prolonged exposure: A randomized clinical trial in military veterans. *Addictive Behaviors*, 90, 369-277.
2. Bichescu, D., Neuner, F., Schauer, M., & Elbert, T. (2007). Narrative exposure therapy for political imprisonment related chronic posttraumatic stress disorder and depression. *Behaviour Research and Therapy*, 45, 2212-2220. doi:10.1016/j.brat.2006.12.006
3. Butollo, W., Karl, R., König, J., & Rosner, R. (2015). A randomized controlled clinical trial of dialogical exposure therapy versus cognitive processing therapy for adult outpatients suffering from PTSD after type I trauma in adulthood. *Psychotherapy and Psychosomatics*, 85(1), 16-26. doi:10.1159/000440726
4. Capezzani, L., Ostacoli, L., Cavallo, M., Carletto, S., Fernandez, I., Solomon, R., . . . Cantelmi, T. (2013). EMDR and CBT for cancer patients: Comparative study of effects on PTSD, anxiety, and depression. *Journal of EMDR Practice and Research*, 7, 134-43. doi:10.1891/1933-3196.7.3.134
5. Cloitre, M., Koenen, K., Cohen, L., & Han, H. (2002). Skills training in affective and interpersonal regulation followed by exposure: A phase-based treatment for PTSD related to childhood abuse. *Journal of Consulting and Clinical Psychology*, 70, 1067-1074.
6. Cloitre, M., Stovall-McClough, K. C., Noonan, K., Zorbas, P., Cherry, S., Jackson, C. L., . . . Petkova, E. (2010). Treatment for PTSD related to childhood abuse: A randomized controlled trial. *American Journal of Psychiatry*, 167, 915–924. doi:10.1176/appi.ajp.2010.09081247
7. Devilly, G., & Spence, S. (1999). The relative efficacy and treatment distress of EMDR and a cognitive-behavior trauma treatment protocol in the amelioration of posttraumatic stress disorder. *Journal of Anxiety Disorders*, 13(1-2), 131-57. doi:10.1016/S0887-6185(98)00044-9
8. Duran, É. P., Corchs, F., Vianna, A., Araújo, Á. C., Del Real, N., Silva, C., Ferreira, A. P., De Vito Francez, P., Godói, C., Silveira, H., Matsumoto, L., Gebara, C. M., de Barros Neto, T. P., Chilvarquer, R., de Siqueira, L. L., Bernik, M., & Neto, F. L. (2021). A randomized clinical trial to assess the efficacy of trial-based cognitive therapy compared to prolonged exposure for post-traumatic stress disorder: preliminary findings. *CNS spectrums*, 26(4), 427–434. <https://doi.org/10.1017/S1092852920001455>
9. Ford JD, Grasso DJ, Greene CA, Slivinsky M, DeViva JC (2018). Randomized clinical trial pilot study of prolonged exposure versus present centred affect regulation therapy for PTSD and anger problems with male military combat veterans.
10. Gamito, P., Oliveira, J., Rosa, P., Morais, D., Duarte, N., Oliveira, S., . . . Saraiva, T. (2010). PTSD elderly war veterans: A clinical controlled pilot study. *Cyberpsychology, Behavior and Social Networking*, 13(1), 43-8. doi:10.1089=cyber.2009.0237
11. Laugharne, J., Kullack, C., Lee, C., McGuire, T., Brockman, S., Drummond, P., . . . Starkstein, S. (2016). Amygdala volumetric change following psychotherapy for posttraumatic stress disorder. *The Journal of Neuropsychiatry and Clinical Neurosciences*, 28(4), 312-318. doi:10.1176/appi.neuropsych.16010006
12. Lee, C., Gavriel, H., Drummond, P., Richards, J., & Greenwald, R. (2002). Treatment of PTSD: Stress inoculation training with prolonged exposure compared to EMDR. *Journal of Clinical Psychology*, 58, 1071-89. doi:10.1002/jclp.10039
13. Lely, J. C., Knipscheer, J. W., Moerbeek, M., Ter Heide, F. J., van den Bout, J., & Kleber, R. J. (2019). Randomised controlled trial comparing narrative exposure therapy with present-centred therapy for older patients with post-traumatic stress disorder. *The British Journal of Psychiatry*, 214(6), 1-9. doi:10.1192/bjp.2019.59
14. Markowitz, J., Petkova, E., Neria, Y., Van Meter, P. E., Zhao, Y., Hembree, E., & Marshall, R. D. (2015). Is exposure necessary? A randomized clinical trial of interpersonal psychotherapy for PTSD. *American Journal of Psychiatry*, 172, 430–440.
15. Monson, C., Schnurr, P. P., Resick, P. A., Friedman, M. J., Young-Xu, Y., & Stevens, S. P. (2006). Cognitive processing therapy for veterans with military related posttraumatic stress disorder. *Journal of Consulting and Clinical Psychology*, 74, 898-907. doi:0.1037/0022-006X.74.5.898

16. Nijdam, M. J., Gersons, B. P., Reitsma, J. B., de Jongh, A., & Olff, M. (2012). Brief eclectic psychotherapy v. eye movement desensitisation and reprocessing therapy for post-traumatic stress disorder: Randomised controlled trial. *The British Journal of Psychiatry*, 200(3), 224-31. doi:10.1192/bjp.bp.111.099234
17. Norman, S. B., Trim, R., Haller, M., Davis, B. C., Myers, U. S., Colvonen, P. J., . . . Mayes, T. (2019). Efficacy of integrated exposure therapy vs integrated coping skills therapy for comorbid posttraumatic stress disorder and alcohol use disorder. *JAMA Psychiatry*, 201976(8), 791-799 doi:10.1001/jamapsychiatry.2019.0638
18. Orang, T., Ayoughi, S., Moran, J. K., Ghaffari, H., Mostafavi, S., Rasouljan, M., . . . Elbert, T. (2018). The efficacy of narrative exposure therapy in a sample of Iranian women exposed to ongoing intimate partner violence— A randomized controlled trial. *Clinical Psychology & Psychotherapy*, 25(6), 827-841. doi:10.1002/cpp.2318
19. Paunovic, N. (2011). Exposure inhibition therapy as a treatment for chronic posttraumatic stress disorder: A controlled pilot study. *Psychology*, 2(6), 605. doi:10.4236/psych.2011.26093
20. Resick, P., Nishith, P., Weaver, T., Astin, M., & Feuer, C. (2002). A comparison of cognitive-processing therapy with prolonged exposure and a waiting condition for the treatment of chronic posttraumatic stress disorder in female rape victims. *Journal of Consulting and Clinical Psychology*, 70(4), 867. doi:10.1037/0022-006X.70.4.867
21. Schnyder, U., Müller, J., Maercker, A., & Wittmann, L. (2011). Brief eclectic psychotherapy for PTSD: A randomized controlled trial. *Journal of Clinical Psychiatry*, 72, 564-566. doi:10.4088/JCP.10l06247blu
22. Tylee, D. S., Gray, R., Glatt, S. J., & Bourke, F. (2017). Evaluation of the reconsolidation of traumatic memories protocol for the treatment of PTSD: A randomized, wait-list-controlled trial. *Journal of Military, Veteran and Family Health*. 3(1), 21-33. doi:10.3138/jmvfh.4120
23. Vujanovica, A. A., Smith, L. J., Green, C. E., Laneb, S. D., & Schmitz, J. M. (2018). Development of a novel, integrated cognitive-behavioral therapy for co-occurring posttraumatic stress and substance use disorders: A pilot randomized clinical trial. *Contemporary Clinical Trials*, 65, 123-129. doi:10.1016/j.cct.2017.12.013
24. Zang, Y., Hunt, N., & Cox, T. (2013). A randomised controlled pilot study: The effectiveness of narrative exposure therapy with adult survivors of the Sichuan earthquake. *BMC Psychiatry*, 13(1), 41. doi:10.1186/1471-244X-13-41
25. Zang, Y., Hunt, N., & Cox, T. (2014). Adapting narrative exposure therapy for Chinese earthquake survivors: A pilot randomised controlled feasibility study. *BMC Psychiatry*, 14, 262. doi:10.1186/s12888-014-0262-3.

#### Unavailable participant level data

1. Adenauer, H., Catani, C., Gola, H., Keil, J., Ruf, M., Schauer, M., & Neuner, F. (2011). Narrative exposure therapy for PTSD increases top-down processing of aversive stimuli – evidence from a randomized controlled treatment trial. *BMC Neuroscience*, 12(1), 1–13."
2. Asukai, N., Saito, A., Tsuruta, N., Kishimoto, J., & Nishikawa, T. (2010). Efficacy of exposure therapy for Japanese patients with posttraumatic stress disorder due to mixed traumatic events: A randomized controlled study. *Journal of Traumatic Stress*, 23(6), 744-750. doi:10.1002/jts.20589
3. Blanchard, E. B., Hickling, E. J., Devineni, T., Veazey, C. H., Galovski, T. E., Mundy, E. . . . Buckley, T. C. (2003). A controlled evaluation of cognitive behavioral therapy for posttraumatic stress in motor vehicle accident survivors. *Behaviour Research and Therapy*, 41(1), 79-96. doi:10.1016/s0005-7967(01)00131-0
4. Bohus, M., Kleindienst, N., Hahn, C., Müller-Engelmann, M., Ludäscher, P., Steil, R., Fydrich, T., Kuehner, C., Resick, P. A., Stiglmayr, C., Schmahl, C., & Priebe, K. (2020). Dialectical Behavior Therapy for Posttraumatic Stress Disorder (DBT-PTSD) Compared With Cognitive Processing Therapy (CPT) in Complex Presentations of PTSD in Women Survivors of Childhood Abuse: A Randomized Clinical Trial. *JAMA psychiatry*, 77(12), 1235–1245. <https://doi.org/10.1001/jamapsychiatry.2020.2148>
5. Boterhoven de Haan, K. L., Lee, C. W., Fassbinder, E., Voncken, M. J., Meewisse, M., Van Es, S. M., Menninga, S., Kousemaker, M., & Arntz, A. (2017). Imagery rescripting and eye movement desensitisation and reprocessing for treatment of adults with childhood trauma-related post-traumatic stress disorder: IREM study design. *BMC psychiatry*, 17(1), 165. <https://doi.org/10.1186/s12888-017-1330-2>
6. Brom, D., Kleber, R., & Defares, P. Brief psychotherapy for posttraumatic stress disorders. (1989). *Journal of Consulting & Clinical Psychology*, 57(5), 607-612. doi:10.1037//0022-006x.57.5.607
7. Bryant, R. A., Kenny, L., Rawson, N., Cahill, C., Joscelyne, A., Garber, B., . . . Nickerson, A. (2018). Efficacy of exposure-based cognitive behaviour therapy for post-traumatic stress disorder in emergency service personnel. *Psychological Medicine*, 49(9), 1565-1573. doi:10.1017/S0033291718002234

8. Bryant, R. A., Ekasawin, S., Chakrabhand, S., Suwanmitri, S., Duangchun, O., & Chantaluckwong, T. (2011). A randomized controlled effectiveness trial of cognitive behavior therapy for post-traumatic stress disorder in terrorist-affected people in Thailand. *World Psychiatry*, 10(3), 205-209. Retrieved from <https://www.ncbi.nlm.nih.gov/pmc/articles/PMC3188775/>
9. Bryant, R., Moulds, M., Guthrie, R., Dang, S., & Nixon, R. (2003). Imaginal exposure alone and imaginal exposure with cognitive restructuring in treatment of posttraumatic stress disorder. *Journal of Consulting and Clinical Psychology*, 71, 706-712. doi:10.1037/0022-006X.71.4.706
10. Buhmann, C., Nordentoft, M., Ekstroem, M., Carlsson, J., & Mortensen, E. The effect of flexible cognitive-behavioural therapy and medical treatment, including antidepressants on post-traumatic stress disorder and depression in traumatised refugees: Pragmatic randomised controlled clinical trial. *The British Journal of Psychiatry*, 208(3), 252-259. doi:10.1192/bjp.bp.114.150961
11. Cottraux et al., 2008. Randomized controlled comparison of cognitive behavior therapy with Rogerian supportive therapy in chronic post-traumatic stress disorder: a 2-year follow-up.
12. Duffy, M., Gillespie, K., & Clark, D. (2007). Post-traumatic stress disorder in the context of terrorism and other civil conflict in Northern Ireland: Randomised controlled trial. *British Medical Journal*, 334, 1147-1450. doi:10.1136/bmj.39021.846852.BE
13. Dunne, R. L., Kenardy, J., & Sterling, M. (2012). A randomized controlled trial of cognitive-behavioral therapy for the treatment of PTSD in the context of chronic whiplash. *The Clinical Journal of Pain*, 28(9), 755-765. doi:10.1097/AJP.0b013e318243e16b
14. Ehlers, A., Clark, D., Hackman, A., McManus, F., & Fennell, M. (2005). Cognitive therapy for post-traumatic stress disorder: Development and evaluation. *Behaviour Research and Therapy*, 43, 413-431. doi:10.1016/j.brat.2004.03.006
15. Ehlers, A., Clark, D., Hackman, A., McManus, F., & Fennell, M., Herbert, C., . . . Mayou, R. (2003). A randomized controlled trial of cognitive therapy, a self-help booklet, and repeated assessments as early interventions for posttraumatic stress disorder. *Archives of General Psychiatry*, 60(10), 1024-1032. doi: 10.1001/archpsyc.60.10.1024
16. Ehlers, A., Hackmann, A., Grey, N., Wild, J., Liness, S., & Albert, I., . . . Clark, D. (2014). A randomized controlled trial of 7-day intensive and standard weekly cognitive therapy for PTSD and emotion-focused supportive therapy. *American Journal of Psychiatry*, 171, 294-304. doi:10.1176/appi.ajp.2013.13040552.
17. Fecteau, G., & Nicki, R. (1999). Cognitive behavioural treatment of post traumatic stress disorder after motor vehicle accident. *Behavioural & Cognitive Psychotherapy*, 27(3), 201-214. doi:10.1017/S135246589927302X
18. Feske, U. (2008). Treating low-income and minority women with posttraumatic stress disorder. A pilot study comparing prolonged exposure and treatment as usual conducted by community therapists. *Journal of Interpersonal Violence*, 23(8), 1027-1040. doi:10.1177/0886260507313967
19. Foa, E., Rothbaum, B., Riggs, D., & Murdock T. (1991). Treatment of posttraumatic stress disorder in rape victims: a comparison between cognitive-behavioral procedures and counseling. *Journal of Consulting and Clinical Psychology*, 59(5), 715-723. doi:10.1037//0022-006x.59.5.715
20. Foa, E., Dancu, C. V., Hembree, E. A., Jaycox, L. H., Meadows, E. A., & Street, G. P. (1999). A comparison of exposure therapy, stress inoculation training, and their combination for reducing posttraumatic stress disorder in female assault victims. *Journal of Consulting and Clinical Psychology*, 67(2), 194-200.
21. Foa, E., Hembree, E., Cahill, S., Rauch, S., Riggs, D., Feeny, N., . . . Yadin, E. (2005). Randomized trial of prolonged exposure for posttraumatic stress disorder with and without cognitive restructuring: Outcome at academic and community clinics. *Journal of Consulting and Clinical Psychology*, 73, 953-64. doi:10.1037/0022-006X.73.5.953
22. Foa, E., McLean, C., Zang, Y., Rosenfield, D., Yadin, E., Yarvis, J., . . . the STRONG STAR Consortium (2018). Effect of prolonged exposure therapy delivered over 2 weeks vs 8 weeks vs present-centered therapy on PTSD symptom severity in military personnel: A randomized clinical trial. *JAMA*, 319(4), 354-364. doi:0.1001/jama.2017.21242
23. Fonzo, G., Goodkind, M., Oathes, D., Zaiko, Y., Harvey, M., Peng, K., . . . Etkin, A. (2017). PTSD psychotherapy outcome predicted by brain activation during emotional reactivity and regulation. *The American Journal of Psychiatry*, 174(12), 1163-1174. doi:10.1176/appi.ajp.2017.16091072

24. Forbes, D., Lloyd, D., Nixon, R., Elliott, P., Varker, T., Perry, D., . . . Creamer, M. (2012). A multisite randomized controlled effectiveness trial of cognitive processing therapy for military-related posttraumatic stress disorder. *Journal of Anxiety Disorders*, 26(3), 442-452. doi:10.1016/j.janxdis.2012.01.006
25. Galovski, T. E., Blain, L. M., Mott, J. M., Elwood, L., Houle, T. (2012). Manualized therapy for PTSD: Flexing the structure of cognitive processing therapy. *Journal of Consulting and Clinical Psychology*, 80(6), 968. doi:10.1037/a0030600
26. Gersons, B. P., Carlier, I. V., Lamberts, R. D., & Van der Kolk, B. A. (2000). Randomized clinical trial of brief eclectic psychotherapy for police officers with posttraumatic stress disorder. *Journal of Traumatic Stress*, 13(2), 333-347. doi:10.1023/A:1007793803627
27. Gray, R., Budden-Potts, D., & Bourke, F. (2017). Reconsolidation of traumatic memories for PTSD: A randomized controlled trial of 74 male veterans. *Psychotherapy Research*, 29(5), 1–19.
28. Hensel-Dittmann, D., Schauer, M., Ruf, M., Catani, C., Odenwald, M., Elbert, T., . . . Neuner, F. (2011). Treatment of traumatized victims of war and torture: A randomized controlled comparison of narrative exposure therapy and stress inoculation training. *Psychotherapy and Psychosomatics*, 80(6), 345-52. doi:10.1159/000327253
29. Hinton, D., Chhean, D., Pich, V., Safren, S. A., Hofmann, S. G., Pollack, M. H. (2005). A randomised controlled trial of cognitive behaviour therapy for Cambodian refugees with treatment resistant PTSD and panic attacks: a cross over design. *Journal of Traumatic Stress*, 18, 617-629. doi:10.1002/jts.20070
30. Jacob, N., Neuner, F., Maedl, A., Schaal, S., & Elbert, T. (2014). Dissemination of psychotherapy for trauma spectrum disorders in postconflict settings: A randomized controlled trial in Rwanda. *Psychotherapy and psychosomatics*. 83, 354-363. doi:10.1159/000365114
31. Keane, T., Fairbank, J. A., Caddell, J. M., & Zimering, R. T. (1989). Implosive (flooding) therapy reduces symptoms of PTSD in Vietnam combat veterans. *Behavior Therapy*, 20(2), 245–260.
32. Kubany, E., Hill, E. E., & Owens, J. A. (2003). Cognitive trauma therapy for battered women with PTSD: Preliminary findings. *Journal of Traumatic Stress*, 16, 81-91.
33. Kubany, E., Hill, E. E., & Owens, J. A. (2004). Cognitive trauma therapy for battered women with PTSD (CTT-BW). *Journal of Consulting and Clinical Psychology*, 72(1), 3-18. doi:10.1037/0022-006X.72.1.3
34. McDonagh, A., Friedman, M., McHugo, G., Ford, J., Sengupta, A., Mueser, K., . . . Descamps, M. (2005). Randomized controlled trial of cognitive-behavioural therapy for chronic posttraumatic stress disorder in adult female survivors of childhood sexual abuse. *Journal of Consulting and Clinical Psychology*, 73, 515-524. doi:10.1037/0022-006X.73.3.515
35. McLay, R., Baird, A., Webb-Murphy, J., Deal, W., Tran, L., Anson, H., . . . Johnston, S. (2017). A randomized, head-to-head study of virtual reality exposure therapy for posttraumatic stress disorder. *Cyberpsychology, Behavior, and Social Networking*, 20(4), 218-224. doi:10.1089/cyber.2016.0554
36. Morath, J., Moreno-Villanueva, M., Hamuni, G., Kolassa, S., Ruf-Leuschner, M., Schauer, M., . . . Kolassa, I. (2014). Effects of psychotherapy on DNA strand break accumulation originating from traumatic stress. *Psychotherapy and Psychosomatics*, 83(5), 289-297. doi:10.1159/000362739
37. Nacasch, N., Foa, E., Huppert, J., Tzur, D., Fostick, L., Dinstein, Y., . . . Zohar, J. (2011). Prolonged exposure therapy for combat- and terror-related posttraumatic stress disorder: A randomized control comparison with treatment as usual. *Journal of Clinical Psychiatry*, 72, 1174-80. doi:10.4088/JCP.09m05682blu
38. Neuner, F., Kurreck, S., Ruf, M., Odenwald, M., Elbert, T., & Schauer, M. A randomized controlled pilot study Can asylum seekers with posttraumatic stress disorder be successfully treated? *Cognitive Behaviour Therapy*, 39(2), 81-91. doi:10.1080/16506070903121042
39. Neuner, F., Onyut, P. L., Ertl, V., Odenwald, M., Schauer, E., & Elbert, T. (2008). Treatment of posttraumatic stress disorder by trained lay counselors in an African refugee settlement: A randomized controlled trial. *Journal of Consulting and Clinical Psychology*, 76(4), 686. doi:10.1037/0022-006X.76.4.686
40. Neuner, F., Schauer, M., Klaschik, C., Karunakara, U., & Elbert, T. (2004). A comparison of narrative exposure therapy, supportive counselling, and psychoeducation for treating posttraumatic stress disorder in an African refugee settlement. *Journal of Consulting and Clinical Psychology*, 72(4), 579-587. doi:10.1037/0022-006X.72.4.579
41. Nidich, S., Mills, P. J., Rainforth, M., Heppner, P., Schneider, R. H., Rosenthal, N. E., . . . Rutledge, T. (2018). Non-trauma-focused meditation versus exposure therapy in veterans with post-traumatic stress disorder. *The Lancet Psychiatry* 5(12), P975-986. doi:10.1016/S2215-0366(18)30384-5



42. Pacella, M. L., Armelie, A., Boarts, J., Wagner, G., Jones, T., Feeny, N., . . . Delahanty, D. L. (2012). The impact of prolonged exposure on PTSD symptoms and associated psychopathology in people living with HIV: A randomized test of concept. *AIDS and Behavior*, 16(5), 1327-1340. doi:10.1007/s10461-011-0076-y
43. Power, K., McGoldrick, T., Brown, K., Buchanan, R., Sharp, D., Swanson, V. . . Karatzias, T. (2002). A controlled comparison of eye movement desensitisation and reprocessing versus exposure plus cognitive restructuring versus waiting list in the treatment of post-traumatic stress disorder. *Clinical Psychology and Psychotherapy*, 9, 229-318. doi:10.1002/cpp.341
44. Rauch, S., King, A., Abelson, J., Tuerk, P., Smith, E., Rothbaum, B., . . . Liberzon, I. (2015). Biological and symptom changes in posttraumatic stress disorder treatment: A randomized clinical trial. *Depression and Anxiety*, 32, 204-212. doi:10.1002/da.22331
45. Reger, G., Koenen-Woods, P., Zetocha, K., Smolensk, D., Holloway, K., Rothbaum, B., . . . Gahm, G. (2016). Randomized controlled trial of prolonged exposure using imaginal exposure vs. virtual reality exposure in active duty soldiers with deployment-related posttraumatic stress disorder (PTSD). *Journal of Consulting and Clinical Psychology*, 84(11), 946-959. doi:10.1037/ccp0000134
46. Resick, P., Wachen, J., Dondanville, K., Pruiksma, K., Yarvis, J., Peterson, A., . . . the STRONG STAR Consortium. (2017). Effect of group vs individual cognitive processing therapy in active-duty military seeking treatment for posttraumatic stress disorder: A randomized clinical trial. *JAMA psychiatry*, 74(1), 28-36. doi:10.1001/jamapsychiatry.2016.2729
47. Rothbaum, B., Astin, M. C., & Marsteller, F. (2005). Prolonged exposure versus eye movement desensitisation and reprocessing (EMDR) for PTSD rape victims. *Journal of Traumatic Stress*, 18, 607-616. doi:10.1002/jts.20069
48. Schnurr, P., Friedman, M. J., Engel, C. C., Foa, E. B., Shea, M. T., Chow, B. K., . . . Bernardy, N. (2007). Cognitive behavioural therapy for posttraumatic stress disorder in women. . *JAMA*, 28, 820-830. doi:10.1001/jama.297.8.820
49. Sloan, D. M., Marx, B. P., Lee, D. J., & Resick, P. A. (2018b). Brief Exposure-Based Treatment vs Cognitive Processing Therapy for Posttraumatic Stress Disorder. *JAMA Psychiatry*, 75(3), 233-239. doi: 10.1001/jamapsychiatry.2017.4249
50. Stenmark, H., Catanim, C., Neuner, F., Elbert, T., & Holen, A. (2013). Treating PTSD in refugees and asylum seekers within the general health care system. A randomized controlled multicenter study. *Behaviour Research and Therapy*, 51, 641-647. doi:10.1016/j.brat.2013.07.002
51. Suris, A., Link-Malcolm, J., Chard, K., Ahn, C., & North, C. (2013). A randomized clinical trial of cognitive processing therapy for veterans with PTSD related to military sexual trauma. *Journal of Traumatic Stress*, 26, 28-37. doi:10.1002/jts.21765
52. Taylor, S., Thordar11son, D. S., Maxfield, L., Fedoroff, I. C., Lovell, K., & Ogradniczuk, J. (2003). Comparative efficacy, speed, and adverse effects of three PTSD treatments: exposure therapy, EMDR, and relaxation training. *Journal of Consulting and Clinical Psychology*, 71, 330-338. doi:10.1080/00332747.2017.1286892
53. Thorp, S. R., Glassman, L. H., Wells, S.Y., Walter, K. H., Gebhardt, H., Twamley, E., . . . Wetherell, J. (2019). A randomized controlled trial of prolonged exposure therapy versus relaxation training for older veterans with military-related PTSD. *Journal of Anxiety Disorders*, 64, 45-54. doi: 10.1016/j.janxdis.2019.02.003
54. Vaughan, K., Armstrong, M. S., Gold, R., O'Connor, N., Jenneke, W., Tarrier, N. (1994). A trial of eye movement desensitization compared to image habituation training and applied muscle relaxation in post-traumatic stress disorder. *Journal of Behavior Therapy and Experimental Psychiatry*, 25, 283-291. doi:10.1016/0005-7916(94)90036-1
55. Wells, A., Walton, D., Lovell, K., & Proctor, D. (2015). Metacognitive therapy versus prolonged exposure in adults with chronic post-traumatic stress disorder: A parallel randomized controlled trial. *Cognitive Therapy and Research*, 39, 70-80. doi:10.1007/s10608-014-9636-6
56. Yehuda, R., Pratchett, L. C., Elmes, M. W., Lehrner, A., Daskalakis, N. P., Koch, E. . . . Bierer, L. (2014). Glucocorticoid-related predictors and correlates of post-traumatic stress disorder treatment response in combat veterans. *Interface Focus*, 4(5), 20140048. doi:10.1098/rsfs.2014.0048

## Appendix 5

### Summary of study characteristics

| Study          | n  | No. sessions | Specific type CBT-TF | Population                 | Country     |
|----------------|----|--------------|----------------------|----------------------------|-------------|
| Back2019       | 54 | 12           | COPE                 | military personnel/veteran | USA         |
| Bichescu2007   | 9  | 5            | NET                  | general population         | Romania     |
| Butollo2015    | 67 | 15           | CPT                  | general population         | Germany     |
| Capezzani2013  | 10 | 8            | CBT-TF               | general population         | Italy       |
| Cloitre2002    | 31 | 16           | STAIR-NT             | general population         | USA         |
| Cloitre2010    | 33 | 16           | STAIR-NT             | general population         | USA         |
| Devilly1999    | 15 | 9            | CBT-TF               | general population         | Australia   |
| Duran2021a     | 51 | 13           | PE                   | general population         | Brazil      |
| Duran2021b     | 44 | 13           | TBCT                 | general population         | Brazil      |
| Ford2018       | 14 | 10           | PE                   | military personnel/veteran | USA         |
| Gamito2010     | 2  | 12           | CBT-TF               | military personnel/veteran | Portugal    |
| Laugharne2016  | 10 | 12           | PE                   | general population         | Australia   |
| Lee2002        | 12 | 7            | CBT-TF               | mixed                      | Australia   |
| Lely2019       | 15 | 15           | NET                  | general population         | Netherlands |
| Markowitz2015  | 38 | 14           | PE                   | mixed                      | USA         |
| Monson2006     | 30 | 12           | CPT                  | military personnel/veteran | USA         |
| Nijdam2012     | 70 | 15           | BEP                  | general population         | Netherlands |
| Norman2019     | 63 | 16           | COPE                 | military personnel/veteran | USA         |
| Orang2018      | 24 | 15           | NET                  | general population         | Iran        |
| Paunovic2011   | 14 | 20           | CBT-TF               | mixed                      | Sweden      |
| Resick2002a    | 62 | 12           | PE                   | general population         | USA         |
| Resick2002b    | 62 | 12           | CPT                  | general population         | USA         |
| Schnyder2011   | 16 | 16           | BEP                  | general population         | Switzerland |
| Tylee2017      | 15 | 3            | RTM                  | military personnel/veteran | USA         |
| Vujanovica2018 | 31 | 12           | TIPSS                | general population         | USA         |
| Zang2013       | 11 | 4            | NET                  | general population         | China       |
| Zang2014a      | 10 | 4            | NET                  | general population         | China       |
| Zang2014b      | 10 | 4            | NET-R                | general population         | China       |

*COPE = Concurrent treatment of PTSD and substance use disorders using Prolonged Exposure; CPT = Cognitive Processing Therapy; CBT-TF = Cognitive Behavioral Therapy with a Trauma Focus; STAIR-NT = Skills Training in Affective and Interpersonal Regulation with Narrative Therapy; PE = Prolonged exposure therapy; BEP = Brief eclectic psychotherapy; NET = Narrative exposure therapy; NET = Narrative exposure therapy – revised; RTM = Reconsolidation of Traumatic Memories; TIPSS = Treatment of Integrated Posttraumatic Stress and Substance Use; mixed = both military personnel/veteran and general population; USA = United States of America.*

## Appendix 6

Summary of participant characteristics (N = 823)

|                                     | n (k)    | M     | SD    |
|-------------------------------------|----------|-------|-------|
| Age (years)                         | 794 (25) | 39.81 | 13.47 |
| Years of education                  | 429 (10) | 14.06 | 2.74  |
|                                     |          | n     | %     |
| Age groups (years)                  | 794 (25) |       |       |
| 18-29                               |          | 219   | 27.58 |
| 30-39                               |          | 196   | 24.69 |
| 40-49                               |          | 178   | 24.69 |
| 50 to 59                            |          | 137   | 17.25 |
| 60-69                               |          | 45    | 5.67  |
| 70-80                               |          | 19    | 2.39  |
| Gender                              | 822 (28) |       |       |
| male                                |          | 326   | 39.66 |
| female                              |          | 496   | 60.34 |
| Race                                | 353 (9)  |       |       |
| white                               |          | 244   | 69.12 |
| african american/black              |          | 91    | 25.78 |
| other <sup>1</sup>                  |          | 18    | 5.11  |
| Relationship status                 | 535 (19) |       |       |
| single/ cohabitating                |          | 211   | 39.44 |
| married                             |          | 199   | 37.20 |
| divorced                            |          | 98    | 18.32 |
| widowed                             |          | 13    | 2.43  |
| separated                           |          | 14    | 2.62  |
| Marital status                      | 535 (19) |       |       |
| unmarried                           |          | 322   | 60.19 |
| married                             |          | 213   | 39.81 |
| Employment status                   | 289 (12) |       |       |
| unemployed                          |          | 73    | 25.26 |
| employed                            |          | 131   | 45.33 |
| student                             |          | 11    | 3.81  |
| retired                             |          | 21    | 7.27  |
| homemaker                           |          | 23    | 7.9   |
| disabled                            |          | 30    | 10.38 |
| Psychotropic medication at baseline | 528 (15) |       |       |
| no                                  |          | 233   | 44.13 |
| yes                                 |          | 295   | 55.87 |
| Trauma type                         | 469 (17) |       |       |
| accident/disaster                   |          | 79    | 16.84 |
| assault: non-sexual                 |          | 27    | 5.76  |
| assault: sexual                     |          | 98    | 20.90 |
| military                            |          | 75    | 15.99 |
| war/persecution/terrorism           |          | 3     | 0.64  |
| death someone close                 |          | 32    | 6.82  |
| injury someone close                |          | 2     | 0.43  |
| domestic violence                   |          | 54    | 11.51 |
| witness violence other              |          | 18    | 3.84  |
| stalking/harassment                 |          | 13    | 2.77  |
| medical-related                     |          | 24    | 5.12  |
| occupational trauma                 |          | 40    | 8.53  |
| loved one held hostage/kidnapped    |          | 3     | 0.64  |

|                                                         |          |     |       |
|---------------------------------------------------------|----------|-----|-------|
| psychological abuse                                     |          | 1   | 0.21  |
| Comorbid MDD                                            | 360 (9)  |     |       |
| no                                                      |          | 86  | 23.89 |
| yes                                                     |          | 274 | 76.11 |
| Comorbid substance use problem<br>(abuse or dependence) | 434 (12) |     |       |
| no                                                      |          | 216 | 49.77 |
| yes                                                     |          | 218 | 50.23 |
| Psychiatric comorbidity                                 | 566 (17) |     |       |
| no                                                      |          | 104 | 18.37 |
| yes                                                     |          | 462 | 81.63 |
| Population                                              | 759 (22) |     |       |
| General population                                      |          | 178 | 76.55 |
| Military personeel/veteran                              |          | 581 | 23.45 |
| Dropout                                                 | 823 (28) |     |       |
| no                                                      |          | 602 | 73.15 |
| yes                                                     |          | 221 | 26.85 |

*n* = number of participants; *k* = number of included study arms; <sup>1</sup>Mixed race, Asian, Native American or pacific islander; MDD = Major depressive disorder

## Appendix 7

### Risk of bias assessment

| Study          | D1: Randomization process | D2: Deviations from intended intervention | D4: Measurement of the outcome |
|----------------|---------------------------|-------------------------------------------|--------------------------------|
| Back2019       | low                       | low                                       | low                            |
| Bichescu2007   | low                       | low                                       | low                            |
| Butollo2015    | some concerns             | low                                       | low                            |
| Capezzani2013  | low                       | some concerns                             | low                            |
| Cloitre2002    | low                       | low                                       | low                            |
| Cloitre2010    | low                       | low                                       | low                            |
| Devilly1999    | some concerns             | low                                       | low                            |
| Duran2021      | low                       | low                                       | low                            |
| Ford2018       | some concerns             | some concerns                             | low                            |
| Gamito2010     | some concerns             | some concerns                             | low                            |
| Laugharne2016  | low                       | low                                       | low                            |
| Lee2002        | low                       | low                                       | low                            |
| Lely2019       | low                       | low                                       | low                            |
| Markowitz2015  | low                       | low                                       | low                            |
| Monson2006     | low                       | low                                       | low                            |
| Nijdam2012     | low                       | low                                       | low                            |
| Norman2019     | low                       | low                                       | low                            |
| Orang2018      | some concerns             | some concerns                             | low                            |
| Paunovic2011   | some concerns             | some concerns                             | low                            |
| Resick2002     | some concerns             | low                                       | low                            |
| Schnyder2011   | some concerns             | low                                       | low                            |
| Tylee2017      | some concerns             | low                                       | low                            |
| Vujanovica2018 | some concerns             | low                                       | low                            |
| Zang2013       | low                       | some concerns                             | low                            |
| Zang2014       | low                       | some concerns                             | low                            |

## Appendix 8

### Posthoc power analyses

| Predictor                                                                  | Bivariate model |       | Multivariate model<br>n (k) = 363 (11) | Parsimonious model<br>n (k) = 730 (22) |
|----------------------------------------------------------------------------|-----------------|-------|----------------------------------------|----------------------------------------|
|                                                                            | n (k)           | power | power                                  | power                                  |
| Age (continuous)                                                           | 794<br>(25)     | 8.8%  | 6.7%                                   | 8.5%                                   |
| Education (years)                                                          | 429<br>(10)     | 9.60% | .                                      | .                                      |
| Male gender                                                                | 822<br>(28)     | 31.3% | 43.3%                                  | .                                      |
| Marital status (married)                                                   | 535<br>(19)     | 98.8% | 74.7%                                  | .                                      |
| Divorced versus other<br>(single/married/cohabitating)                     | 548<br>(19)     | 96.7% | .                                      | .                                      |
| Using psychotropic<br>medication                                           | 528<br>(15)     | 50.8% | .                                      | .                                      |
| PTSD total severity                                                        | 793<br>(27)     | 19.7% | 8.6%                                   | .                                      |
| PTSD intrusion severity                                                    | 499<br>(20)     | 87.7% | .                                      | .                                      |
| PTSD avoidance severity                                                    | 485<br>(19)     | 35.9% | .                                      | .                                      |
| PTSD hyperarousal severity                                                 | 486<br>(18)     | 7.3%  | .                                      | .                                      |
| Substance use problem<br>(abuse/dependence)                                | 434<br>(12)     | 5.5%  | .                                      | .                                      |
| Psychiatric comorbidity<br>(anxiety, depression,<br>substance use problem) | 566<br>(17)     | 100%  | 5.4%                                   | .                                      |
| Population (military<br>personnel/veterans)                                | 759<br>(25)     | 100%  | 100%                                   | 100%                                   |

*n* = number of participants; *k* = number of included study arms
